# Supplementary material
Source: PubMed Central journal article supplement (PMC4089974)

## Supplementary Online Content

Barreto-Filho JA, Wang Y, Dodson JA, et al. Trends in Aortic valve Replacement for Elderly Patients in the United States, 1999-2011. DOI:10.1001/JAMA.2013.282437

**eTable 1.** ICD-9-CM codes used to build the study cohort

**eTable 2.** Characteristics of Patients Hospitalized for Aortic Valve Surgery, 1999-2011

**eTable 3.** Hospitalization Rates for Aortic Valve Surgery, 1999-2011

**eTable 4.** Age-sex-race-adjusted annual trends in rates of aortic valve replacements, overall and by subgroups

**eTable 5.** Outcomes of Aortic Valve Surgery, 1999-2011

**eTable 6.** Age-sex-race-comorbidity-adjusted annual trends in 30-day mortality rates of aortic valve replacements, overall and by subgroups

**eTable 7.** Age-sex-race-comorbidity-adjusted annual trends in 1-year mortality rates of aortic valve replacements, overall and by subgroups

**eTable 8.** Age-sex-race-comorbidity-adjusted annual trends in 30-day readmission rates of aortic valve replacements, overall and by subgroups

**eTable 9.** Trends in the type of aortic valve replacement and utilization of concomitant coronary artery bypass graft surgery, 1999-2011

**eFigure.** Annual Change Rates in Procedure, Mortality, and Readmission

This supplementary material has been provided by the authors to give readers additional information about their work.

**eTable 1. ICD-9-CM codes used to build the study cohort**

| <b>Procedure</b>                                            | <b>ICD-9-CM code</b> |
|-------------------------------------------------------------|----------------------|
| Aortic valve surgery replacement with bioprosthesis         | 35.21                |
| Aortic valve surgery replacement with mechanical prosthesis | 35.22                |
| Coronary artery bypass graft surgery                        | 36.10 – 36.16        |
| Tricuspid valve surgery                                     | 35.14, 35.27, 35.28  |
| Endocarditis                                                | 421.0, 421.1, 421.9  |
| Mitral valve surgery                                        | 35.12                |

ICD-9-CM, International Classification of Diseases, Ninth Revision, Clinical Modification

**eTable 2.** Characteristics of Patients Hospitalized for Aortic Valve Surgery, 1999-2011

|                   | No. (%) of Patients |                 |                 |                 |                 |                 |                 |                 |                 |                 |                 |                 |                 |
|-------------------|---------------------|-----------------|-----------------|-----------------|-----------------|-----------------|-----------------|-----------------|-----------------|-----------------|-----------------|-----------------|-----------------|
|                   | 999                 | 000             | 001             | 002             | 003             | 004             | 005             | 006             | 007             | 008             | 009             | 010             | 011             |
| No. of patients   | 4 568               | 5 460           | 6 598           | 7 845           | 8 186           | 9 226           | 8 687           | 9 134           | 8 039           | 8 905           | 0 418           | 0 780           | 1 380           |
| Demographics      |                     |                 |                 |                 |                 |                 |                 |                 |                 |                 |                 |                 |                 |
| Age, mean (SD), y | 6.1<br>(5.9)        | 6.4<br>(5.9)    | 6.4<br>(5.9)    | 6.5<br>(6.0)    | 6.5<br>(6.0)    | 6.6<br>(6.1)    | 6.5<br>(6.2)    | 6.6<br>(6.2)    | 6.8<br>(6.3)    | 6.8<br>(6.4)    | 6.9<br>(6.5)    | 7.0<br>(6.6)    | 7.1<br>(6.7)    |
| Women             | 0 509<br>(42.8)     | 0 912<br>(42.9) | 1 234<br>(42.2) | 1 692<br>(42.0) | 1 873<br>(42.1) | 2 085<br>(41.4) | 1 902<br>(41.5) | 1 854<br>(40.7) | 1 644<br>(41.5) | 1 635<br>(40.3) | 2 364<br>(40.6) | 2 301<br>(40.0) | 2 645<br>(40.3) |
| White             | 3 033<br>(93.8)     | 3 815<br>(93.5) | 4 958<br>(93.8) | 6 028<br>(93.5) | 6 365<br>(93.5) | 7 264<br>(93.3) | 6 780<br>(93.4) | 7 291<br>(93.7) | 6 239<br>(93.6) | 7 108<br>(93.8) | 8 504<br>(93.7) | 8 765<br>(93.5) | 9 316<br>(93.4) |
| Black             | 57<br>(3.5)         | 68<br>(3.4)     | 70<br>(3.3)     | 38<br>(3.4)     | 40<br>(3.3)     | 006<br>(3.4)    | 36<br>(3.3)     | 61<br>(3.3)     | 96<br>(3.2)     | 45<br>(3.3)     | 62<br>(3.2)     | 014<br>(3.3)    | 013<br>(3.2)    |
| Other racea       | 78<br>(2.8)         | 77<br>(3.1)     | 70<br>(2.9)     | 79<br>(3.2)     | 81<br>(3.1)     | 56<br>(3.3)     | 71<br>(3.4)     | 82<br>(3.0)     | 04<br>(3.2)     | 52<br>(2.9)     | 52<br>(3.1)     | 001<br>(3.3)    | 051<br>(3.3)    |

|                                            |                 |                 |                 |                 |                 |                 |                 |                 |                 |                 |                 |                 |                 |
|--------------------------------------------|-----------------|-----------------|-----------------|-----------------|-----------------|-----------------|-----------------|-----------------|-----------------|-----------------|-----------------|-----------------|-----------------|
| Risk factors and cardiovascular conditions |                 |                 |                 |                 |                 |                 |                 |                 |                 |                 |                 |                 |                 |
| Hypertension                               | 2 736<br>(51.8) | 3 613<br>(53.5) | 4 940<br>(56.2) | 5 827<br>(56.8) | 6 238<br>(57.6) | 7 333<br>(59.3) | 6 901<br>(58.9) | 6 847<br>(57.8) | 6 881<br>(60.2) | 7 934<br>(62.0) | 8 544<br>(61.0) | 8 863<br>(61.3) | 0 613<br>(65.7) |
| Diabetes mellitus                          | 168<br>(21.0)   | 488<br>(21.6)   | 852<br>(22.0)   | 313<br>(22.7)   | 660<br>(23.6)   | 996<br>(23.9)   | 204<br>(25.1)   | 196<br>(24.7)   | 130<br>(25.4)   | 432<br>(25.7)   | 841<br>(25.8)   | 911<br>(25.7)   | 679<br>(27.7)   |
| Atherosclerotic disease                    | 4 904<br>(60.7) | 5 640<br>(61.4) | 6 231<br>(61.0) | 7 162<br>(61.6) | 7 214<br>(61.1) | 7 897<br>(61.2) | 7 194<br>(59.9) | 7 230<br>(59.1) | 6 430<br>(58.6) | 7 140<br>(59.3) | 7 372<br>(57.1) | 7 282<br>(56.1) | 7 954<br>(57.2) |
| Unstable angina                            | 321<br>(5.4)    | 363<br>(5.4)    | 293<br>(4.9)    | 156<br>(4.2)    | 143<br>(4.1)    | 015<br>(3.5)    | 48<br>(3.3)     | 52<br>(2.9)     | 30<br>(3.0)     | 83<br>(2.7)     | 97<br>(2.6)     | 16<br>(2.3)     | 78<br>(2.5)     |
| Prior myocardial infarction                | 29<br>(3.8)     | 95<br>(3.9)     | 027<br>(3.9)    | 030<br>(3.7)    | 067<br>(3.8)    | 059<br>(3.6)    | 096<br>(3.8)    | 026<br>(3.5)    | 046<br>(3.7)    | 117<br>(3.9)    | 250<br>(4.1)    | 273<br>(4.1)    | 270<br>(4.0)    |
| Prior heart failure                        | 510<br>(18.4)   | 624<br>(18.2)   | 743<br>(17.8)   | 803<br>(17.2)   | 824<br>(17.1)   | 896<br>(16.8)   | 732<br>(16.5)   | 595<br>(15.8)   | 493<br>(16.0)   | 677<br>(16.2)   | 957<br>(16.3)   | 068<br>(16.5)   | 534<br>(17.6)   |
| Peripheral vascular disease                | 363<br>(5.5)    | 439<br>(5.7)    | 582<br>(5.9)    | 641<br>(5.9)    | 727<br>(6.1)    | 725<br>(5.9)    | 746<br>(6.1)    | 775<br>(6.1)    | 696<br>(6.0)    | 864<br>(6.4)    | 904<br>(6.3)    | 837<br>(6.0)    | 991<br>(6.3)    |
| Stroke                                     | 26<br>(0.9)     | 73<br>(1.1)     | 78<br>(1.0)     | 95<br>(1.1)     | 81<br>(1.0)     | 35<br>(0.8)     | 89<br>(1.0)     | 91<br>(1.0)     | 93<br>(1.0)     | 07<br>(1.1)     | 07<br>(1.0)     | 48<br>(1.1)     | 79<br>(1.2)     |
| Cerebrovascular disease other than stroke  |                 |                 |                 |                 |                 |                 |                 |                 |                 |                 |                 |                 |                 |

© 2013 American Medical Association. All rights reserved.

|                                       |               |               |               |               |               |               |               |               |               |               |               |               |               |
|---------------------------------------|---------------|---------------|---------------|---------------|---------------|---------------|---------------|---------------|---------------|---------------|---------------|---------------|---------------|
|                                       | 014<br>(4.1)  | 066<br>(4.2)  | 157<br>(4.3)  | 118<br>(4.0)  | 095<br>(3.9)  | 121<br>(3.8)  | 144<br>(4.0)  | 102<br>(3.8)  | 078<br>(3.8)  | 113<br>(3.9)  | 138<br>(3.7)  | 094<br>(3.6)  | 228<br>(3.9)  |
| Geriatric conditions                  |               |               |               |               |               |               |               |               |               |               |               |               |               |
| Dementia                              | 76<br>(1.1)   | 95<br>(1.2)   | 18<br>(1.2)   | 56<br>(1.3)   | 60<br>(1.3)   | 37<br>(1.5)   | 04<br>(1.4)   | 50<br>(1.5)   | 24<br>(1.5)   | 77<br>(1.7)   | 40<br>(1.8)   | 99<br>(1.9)   | 88<br>(2.2)   |
| Functional disability                 | 10<br>(0.9)   | 27<br>(0.9)   | 11<br>(0.8)   | 44<br>(0.9)   | 37<br>(0.8)   | 79<br>(1.0)   | 02<br>(0.7)   | 37<br>(0.8)   | 28<br>(0.8)   | 09<br>(1.1)   | 10<br>(1.0)   | 04<br>(1.0)   | 36<br>(1.1)   |
| Malnutrition                          | 37<br>(1.4)   | 80<br>(1.5)   | 96<br>(1.5)   | 92<br>(1.8)   | 12<br>(1.8)   | 62<br>(1.9)   | 11<br>(2.1)   | 80<br>(2.3)   | 79<br>(2.8)   | 028<br>(3.6)  | 218<br>(4.0)  | 330<br>(4.3)  | 433<br>(4.6)  |
| Other conditions                      |               |               |               |               |               |               |               |               |               |               |               |               |               |
| Renal failure                         | 01<br>(2.4)   | 49<br>(2.5)   | 75<br>(2.9)   | 85<br>(3.2)   | 51<br>(3.4)   | 068<br>(3.7)  | 226<br>(4.3)  | 780<br>(6.1)  | 122<br>(7.6)  | 263<br>(7.8)  | 554<br>(8.4)  | 922<br>(9.5)  | 271<br>(10.4) |
| Chronic obstructive pulmonary disease | 656<br>(19.0) | 903<br>(19.3) | 362<br>(20.2) | 729<br>(20.6) | 784<br>(20.5) | 943<br>(20.3) | 170<br>(21.5) | 170<br>(21.2) | 759<br>(20.5) | 504<br>(15.6) | 595<br>(15.1) | 582<br>(14.9) | 092<br>(16.2) |
| Pneumonia                             | 673<br>(6.8)  | 712<br>(6.7)  | 830<br>(6.9)  | 925<br>(6.9)  | 963<br>(7.0)  | 164<br>(7.4)  | 226<br>(7.8)  | 229<br>(7.7)  | 163<br>(7.7)  | 721<br>(9.4)  | 779<br>(9.1)  | 903<br>(9.4)  | 042<br>(9.7)  |
| Respiratory failure                   | 58<br>(2.3)   | 71<br>(2.2)   | 69<br>(2.1)   | 99<br>(2.2)   | 90<br>(2.1)   | 86<br>(2.0)   | 25<br>(2.2)   | 70<br>(2.6)   | 25<br>(3.3)   | 020<br>(3.5)  | 107<br>(3.6)  | 206<br>(3.9)  | 414<br>(4.5)  |
| Liver disease                         |               |               |               |               |               |               |               |               |               |               |               |               |               |

© 2013 American Medical Association. All rights reserved.

|                             |              |              |              |              |              |              |              |              |              |              |              |              |              |
|-----------------------------|--------------|--------------|--------------|--------------|--------------|--------------|--------------|--------------|--------------|--------------|--------------|--------------|--------------|
|                             | 70<br>(0.7)  | 40<br>(0.5)  | 89<br>(0.7)  | 94<br>(0.7)  | 10<br>(0.7)  | 01<br>(0.7)  | 21<br>(0.8)  | 90<br>(0.7)  | 93<br>(0.7)  | 13<br>(0.7)  | 40<br>(0.8)  | 28<br>(0.7)  | 06<br>(1.0)  |
| Cancer                      | 188<br>(4.8) | 229<br>(4.8) | 237<br>(4.7) | 342<br>(4.8) | 338<br>(4.7) | 378<br>(4.7) | 373<br>(4.8) | 363<br>(4.7) | 304<br>(4.7) | 370<br>(4.7) | 372<br>(4.5) | 410<br>(4.6) | 487<br>(4.7) |
| Major psychiatric disorders | 08<br>(0.8)  | 33<br>(0.9)  | 45<br>(0.9)  | 47<br>(0.9)  | 36<br>(0.8)  | 34<br>(0.8)  | 50<br>(0.9)  | 39<br>(0.8)  | 41<br>(0.9)  | 17<br>(1.1)  | 18<br>(1.0)  | 36<br>(1.1)  | 62<br>(1.2)  |
| Depression                  | 88<br>(2.0)  | 75<br>(2.3)  | 88<br>(2.6)  | 30<br>(2.6)  | 49<br>(3.0)  | 22<br>(3.2)  | 76<br>(3.1)  | 41<br>(2.9)  | 89<br>(3.2)  | 63<br>(3.3)  | 60<br>(3.2)  | 71<br>(3.2)  | 203<br>(3.8) |
| Trauma in past year         | 24<br>(2.9)  | 99<br>(2.7)  | 10<br>(3.0)  | 03<br>(3.2)  | 009<br>(3.6) | 091<br>(3.7) | 080<br>(3.8) | 124<br>(3.9) | 058<br>(3.8) | 081<br>(3.7) | 86<br>(3.2)  | 096<br>(3.6) | 182<br>(3.8) |

<sup>a</sup>Other race includes Asian, Hispanic, North American Native, or other not specified.

**eTable 3. Hospitalization Rates for Aortic Valve Surgery, 1999-2011**

|                                | 1999       | 2000       | 2001       | 2002       | 2003       | 2004       | 2005       | 2006       | 2007       | 2008       | 2009       | 2010       | 2011       |
|--------------------------------|------------|------------|------------|------------|------------|------------|------------|------------|------------|------------|------------|------------|------------|
| Person-years                   | 26 479 079 | 26 768 087 | 27 553 904 | 28 345 999 | 28 821 487 | 29 109 293 | 29 157 293 | 28 452 501 | 27 899 732 | 27 675 586 | 27 343 436 | 27 696 576 | 27 958 093 |
| No. of patients                |            |            |            |            |            |            |            |            |            |            |            |            |            |
| Overall                        | 24 568     | 25 460     | 26 598     | 27 845     | 28 186     | 29 226     | 28 687     | 29 134     | 28 039     | 28 905     | 30 418     | 30 780     | 31 380     |
| AVR                            |            |            |            |            |            |            |            |            |            |            |            |            |            |
| Without CABG                   | 10 589     | 11 182     | 11 778     | 12 600     | 12 735     | 13 318     | 13 140     | 13 639     | 13 635     | 14 516     | 15 994     | 16 779     | 17 901     |
| With CABG                      | 13 979     | 14 278     | 14 820     | 15 245     | 15 451     | 15 908     | 15 547     | 15 495     | 14 404     | 14 389     | 14 424     | 14 001     | 13 479     |
| Rates per 100 000 person-years |            |            |            |            |            |            |            |            |            |            |            |            |            |
| Overall                        | 93         | 95         | 97         | 98         | 98         | 100        | 98         | 102        | 100        | 104        | 111        | 111        | 112        |
| Age, y                         |            |            |            |            |            |            |            |            |            |            |            |            |            |
| 65-74                          | 82         | 81         | 81         | 82         | 82         | 83         | 81         | 83         | 79         | 83         | 86         | 85         | 86         |
| 75-84                          | 125        | 130        | 134        | 137        | 136        | 140        | 138        | 147        | 147        | 152        | 167        | 168        | 168        |
| ≥85                            | 48         | 53         | 53         | 55         | 56         | 61         | 58         | 59         | 64         | 72         | 79         | 83         | 91         |
| Sex                            |            |            |            |            |            |            |            |            |            |            |            |            |            |

© 2013 American Medical Association. All rights reserved.

|                         |     |     |     |     |     |     |     |     |     |     |     |     |     |
|-------------------------|-----|-----|-----|-----|-----|-----|-----|-----|-----|-----|-----|-----|-----|
| Men                     | 131 | 133 | 136 | 138 | 136 | 141 | 137 | 143 | 138 | 145 | 153 | 154 | 154 |
| Women                   | 67  | 69  | 69  | 70  | 71  | 71  | 70  | 72  | 73  | 74  | 80  | 78  | 80  |
| Race                    |     |     |     |     |     |     |     |     |     |     |     |     |     |
| White                   | 100 | 102 | 104 | 106 | 106 | 109 | 107 | 111 | 109 | 114 | 122 | 122 | 123 |
| Black                   | 42  | 42  | 40  | 42  | 41  | 43  | 41  | 43  | 42  | 44  | 45  | 46  | 45  |
| Other race <sup>a</sup> | 48  | 51  | 48  | 50  | 48  | 51  | 51  | 46  | 49  | 45  | 51  | 52  | 51  |
| AVR                     |     |     |     |     |     |     |     |     |     |     |     |     |     |
| Without CABG            | 40  | 42  | 43  | 44  | 44  | 46  | 45  | 48  | 49  | 52  | 58  | 61  | 64  |
| With CABG               | 53  | 53  | 54  | 54  | 54  | 55  | 53  | 54  | 52  | 52  | 53  | 51  | 48  |

Abbreviation: AVR, aortic valve replacement; CABG, coronary artery bypass graft.

<sup>a</sup>Other race includes Asian, Hispanic, North American Native, or other not specified



**eTable 4.** Age-sex-race-adjusted annual trends in rates of aortic valve replacements, overall and by subgroups

| Condition     | Incidence rate ratio | 95% CI lower | 95% CI upper |
|---------------|----------------------|--------------|--------------|
| Overall       | 1.017                | 1.016        | 1.018        |
| Age           |                      |              |              |
| 65-74         | 1.004                | 1.002        | 1.005        |
| 75-84         | 1.024                | 1.023        | 1.026        |
| 85+           | 1.045                | 1.041        | 1.048        |
| Race          |                      |              |              |
| White         |                      |              |              |
| Male          | 1.017                | 1.015        | 1.018        |
| Female        | 1.020                | 1.018        | 1.022        |
| Black         |                      |              |              |
| Male          | 1.004                | 0.998        | 1.011        |
| Female        | 1.014                | 1.007        | 1.020        |
| Other Race    |                      |              |              |
| Male          | 1.001                | 0.994        | 1.007        |
| Female        | 1.005                | 0.997        | 1.013        |
| AVR with CABG | 0.995                | 0.994        | 0.997        |
| Age           |                      |              |              |
| 65-74         | 0.983                | 0.981        | 0.985        |
| 75-84         | 1.003                | 1.001        | 1.005        |
| 85+           | 1.009                | 1.004        | 1.014        |
| Race          |                      |              |              |
| White         |                      |              |              |
| Male          | 0.998                | 0.996        | 0.999        |
| Female        | 0.992                | 0.990        | 0.995        |
| Black         |                      |              |              |
| Male          | 0.995                | 0.986        | 1.005        |
| Female        | 0.999                | 0.990        | 1.009        |
| Other Race    |                      |              |              |
| Male          | 0.988                | 0.979        | 0.997        |
| Female        | 0.976                | 0.963        | 0.988        |

© 2013 American Medical Association. All rights reserved.

|                  |       |       |       |
|------------------|-------|-------|-------|
| AVR without CABG | 1.041 | 1.039 | 1.042 |
| Age              |       |       |       |
| 65-74            | 1.025 | 1.023 | 1.027 |
| 75-84            | 1.049 | 1.047 | 1.052 |
| 85+              | 1.084 | 1.079 | 1.089 |
| Race             |       |       |       |
| White            |       |       |       |
| Male             | 1.044 | 1.041 | 1.046 |
| Female           | 1.041 | 1.039 | 1.044 |
| Black            |       |       |       |
| Male             | 1.012 | 1.003 | 1.021 |
| Female           | 1.024 | 1.015 | 1.034 |
| Other Race       |       |       |       |
| Male             | 1.016 | 1.006 | 1.026 |
| Female           | 1.025 | 1.015 | 1.036 |

Abbreviation: AVR, Aortic Valve Replacement; CABG, Coronary Artery Bypass Graft

eTable 5. Outcomes of Aortic Valve Surgery, 1999-2011

|                      | % (95% CI)          |                     |                     |                     |                     |                     |                     |                     |                     |                     |                     |                     |                     |
|----------------------|---------------------|---------------------|---------------------|---------------------|---------------------|---------------------|---------------------|---------------------|---------------------|---------------------|---------------------|---------------------|---------------------|
|                      | 1999                | 2000                | 2001                | 2002                | 2003                | 2004                | 2005                | 2006                | 2007                | 2008                | 2009                | 2010                | 2011                |
| Overall              |                     |                     |                     |                     |                     |                     |                     |                     |                     |                     |                     |                     |                     |
| No. of patients      | 24 568              | 25 460              | 26 598              | 27 845              | 28 186              | 29 226              | 28 687              | 29 134              | 28 039              | 28 905              | 30 418              | 30 780              | 31 380              |
| 30-d Mortality Rates |                     |                     |                     |                     |                     |                     |                     |                     |                     |                     |                     |                     |                     |
| Overall              | 7.6<br>(7.27-7.93)  | 7.1<br>(6.83-7.47)  | 7.3<br>(6.97-7.60)  | 6.9<br>(6.61-7.21)  | 7.1<br>(6.85-7.45)  | 6.8<br>(6.50-7.08)  | 6.0<br>(5.69-6.24)  | 5.9<br>(5.67-6.21)  | 5.5<br>(5.25-5.79)  | 5.6<br>(5.34-5.88)  | 5.5<br>(5.21-5.72)  | 5.0<br>(4.76-5.25)  | 4.2<br>(3.95-4.39)  |
| Age, y               |                     |                     |                     |                     |                     |                     |                     |                     |                     |                     |                     |                     |                     |
| 65-74                | 5.9<br>(5.43-6.35)  | 5.6<br>(5.15-6.06)  | 5.7<br>(5.29-6.19)  | 5.6<br>(5.13-6.00)  | 5.6<br>(5.15-6.02)  | 5.3<br>(4.91-5.75)  | 4.6<br>(4.17-4.96)  | 4.6<br>(4.24-5.03)  | 4.5<br>(4.16-4.97)  | 4.1<br>(3.74-4.49)  | 4.2<br>(3.86-4.61)  | 4.1<br>(3.71-4.44)  | 3.3<br>(2.94-3.59)  |
| 75-84                | 8.2<br>(7.72-8.70)  | 7.7<br>(7.23-8.15)  | 7.8<br>(7.37-8.28)  | 7.4<br>(6.97-7.83)  | 7.6<br>(7.15-8.02)  | 7.0<br>(6.62-7.44)  | 6.3<br>(5.96-6.75)  | 6.4<br>(6.00-6.78)  | 5.6<br>(5.26-6.02)  | 6.0<br>(5.60-6.39)  | 5.7<br>(5.34-6.10)  | 5.0<br>(4.64-5.34)  | 4.4<br>(4.07-4.73)  |
| ≥85                  | 12.3<br>(11.0-13.8) | 10.8<br>(9.60-12.1) | 10.8<br>(9.60-12.1) | 9.8<br>(8.68-11.0)  | 11.1<br>(9.99-12.4) | 11.2<br>(10.1-12.3) | 9.3<br>(8.27-10.4)  | 8.5<br>(7.50-9.50)  | 8.1<br>(7.18-9.10)  | 8.7<br>(7.78-9.66)  | 8.1<br>(7.23-8.94)  | 7.6<br>(6.81-8.43)  | 5.8<br>(5.12-6.49)  |
| Sex                  |                     |                     |                     |                     |                     |                     |                     |                     |                     |                     |                     |                     |                     |
| Men                  | 6.9<br>(6.44-7.29)  | 6.4<br>(6.01-6.81)  | 6.6<br>(6.22-7.01)  | 6.5<br>(6.12-6.89)  | 6.6<br>(6.21-6.98)  | 6.2<br>(5.86-6.58)  | 5.2<br>(4.91-5.59)  | 5.2<br>(4.86-5.53)  | 4.8<br>(4.51-5.17)  | 5.0<br>(4.70-5.36)  | 5.0<br>(4.67-5.31)  | 4.6<br>(4.32-4.93)  | 3.7<br>(3.48-4.03)  |
| Women                | 8.6<br>(8.05-9.13)  | 8.1<br>(7.64-8.68)  | 8.2<br>(7.70-8.72)  | 7.5<br>(7.00-7.97)  | 7.9<br>(7.43-8.41)  | 7.6<br>(7.14-8.09)  | 7.0<br>(6.52-7.45)  | 7.0<br>(6.57-7.49)  | 6.5<br>(6.04-6.94)  | 6.5<br>(6.02-6.93)  | 6.2<br>(5.74-6.59)  | 5.6<br>(5.18-6.00)  | 4.8<br>(4.42-5.17)  |
| Race                 |                     |                     |                     |                     |                     |                     |                     |                     |                     |                     |                     |                     |                     |
| White                | 7.5<br>(7.16-7.84)  | 7.0<br>(6.72-7.37)  | 7.2<br>(6.91-7.56)  | 6.9<br>(6.55-7.16)  | 7.2<br>(6.87-7.50)  | 6.7<br>(6.44-7.03)  | 5.9<br>(5.61-6.17)  | 5.9<br>(5.58-6.14)  | 5.4<br>(5.12-5.67)  | 5.5<br>(5.28-5.83)  | 5.4<br>(5.13-5.66)  | 5.0<br>(4.72-5.22)  | 4.1<br>(3.88-4.33)  |
| Black                | 9.5<br>(7.58-11.6)  | 9.7<br>(7.79-11.8)  | 9.0<br>(7.15-11.1)  | 8.1<br>(6.44-10.0)  | 6.7<br>(5.19-8.49)  | 8.2<br>(6.54-10.0)  | 7.9<br>(6.26-9.82)  | 7.3<br>(5.72-9.11)  | 7.8<br>(6.14-9.77)  | 6.1<br>(4.69-7.86)  | 6.0<br>(4.61-7.72)  | 6.9<br>(5.42-8.64)  | 5.0<br>(3.77-6.57)  |
| Other                | 8.7<br>(6.69-11.1)  | 7.7<br>(5.94-9.83)  | 6.9<br>(5.20-8.91)  | 7.3<br>(5.65-9.20)  | 6.6<br>(5.04-8.43)  | 7.0<br>(5.47-8.82)  | 6.2<br>(4.75-7.88)  | 7.0<br>(5.43-8.92)  | 6.9<br>(5.30-8.71)  | 6.8<br>(5.21-8.71)  | 7.0<br>(5.50-8.85)  | 4.1<br>(2.96-5.52)  | 5.1<br>(3.88-6.65)  |
| AVR                  |                     |                     |                     |                     |                     |                     |                     |                     |                     |                     |                     |                     |                     |
| Without CABG         | 6.6<br>(6.15-7.11)  | 6.6<br>(6.19-7.12)  | 6.5<br>(6.02-6.91)  | 6.3<br>(5.85-6.71)  | 5.9<br>(5.48-6.30)  | 6.0<br>(5.57-6.39)  | 4.8<br>(4.44-5.18)  | 4.9<br>(4.58-5.31)  | 4.6<br>(4.24-4.95)  | 4.6<br>(4.30-4.99)  | 4.5<br>(4.22-4.87)  | 4.3<br>(3.97-4.59)  | 3.5<br>(3.21-3.75)  |
| With CABG            | 8.3<br>(7.89-8.82)  | 7.6<br>(7.14-8.01)  | 7.9<br>(7.51-8.38)  | 7.4<br>(7.02-7.86)  | 8.2<br>(7.77-8.64)  | 7.5<br>(7.09-7.92)  | 6.9<br>(6.54-7.35)  | 6.8<br>(6.45-7.25)  | 6.4<br>(5.99-6.80)  | 6.6<br>(6.20-7.02)  | 6.5<br>(6.09-6.90)  | 5.9<br>(5.47-6.25)  | 5.1<br>(4.76-5.51)  |
| 1-y Mortality Rate   |                     |                     |                     |                     |                     |                     |                     |                     |                     |                     |                     |                     |                     |
| Overall              | 13.6<br>(13.1-14.0) | 12.9<br>(12.5-13.3) | 13.7<br>(13.3-14.2) | 13.3<br>(12.9-13.7) | 13.4<br>(13.0-13.8) | 12.9<br>(12.5-13.3) | 12.6<br>(12.2-13.0) | 12.2<br>(11.9-12.6) | 11.9<br>(11.6-12.3) | 12.1<br>(11.7-12.5) | 11.5<br>(11.2-11.9) | 11.0<br>(10.7-11.4) | 10.9<br>(10.6-11.3) |
| Age, y               |                     |                     |                     |                     |                     |                     |                     |                     |                     |                     |                     |                     |                     |
| 65-74                | 10.5<br>(9.89-11.1) | 9.9<br>(9.29-10.5)  | 10.3<br>(9.74-10.9) | 10.4<br>(9.82-11.0) | 10.0<br>(9.46-10.6) | 9.9<br>(9.39-10.5)  | 9.6<br>(9.02-10.1)  | 9.0<br>(8.50-9.58)  | 8.8<br>(8.27-9.37)  | 8.6<br>(8.08-9.14)  | 8.3<br>(7.77-8.79)  | 8.2<br>(7.68-8.69)  | 8.2<br>(7.67-8.66)  |

© 2013 American Medical Association. All rights reserved.

|                         |                     |                     |                     |                     |                     |                     |                     |                     |                     |                     |                     |                     |                     |
|-------------------------|---------------------|---------------------|---------------------|---------------------|---------------------|---------------------|---------------------|---------------------|---------------------|---------------------|---------------------|---------------------|---------------------|
| 75-84                   | 14.6<br>(14.0-15.3) | 14.0<br>(13.4-14.6) | 15.0<br>(14.4-15.6) | 14.3<br>(13.7-14.8) | 14.3<br>(13.7-14.9) | 13.5<br>(13.0-14.1) | 13.3<br>(12.8-13.9) | 13.2<br>(12.7-13.8) | 12.8<br>(12.3-13.4) | 12.7<br>(12.2-13.3) | 12.4<br>(11.9-12.9) | 11.3<br>(10.8-11.9) | 11.1<br>(10.6-11.6) |
| ≥85                     | 22.2<br>(20.4-24.0) | 19.7<br>(18.1-21.3) | 20.9<br>(19.3-22.6) | 19.8<br>(18.3-21.4) | 22.6<br>(21.0-24.2) | 21.2<br>(19.7-22.7) | 19.9<br>(18.5-21.4) | 18.7<br>(17.3-20.1) | 18.2<br>(16.9-19.6) | 20.3<br>(19.0-21.6) | 17.7<br>(16.5-18.9) | 17.4<br>(16.3-18.6) | 17.5<br>(16.4-18.6) |
| Sex                     |                     |                     |                     |                     |                     |                     |                     |                     |                     |                     |                     |                     |                     |
| Men                     | 12.8<br>(12.3-13.4) | 12.1<br>(11.6-12.7) | 12.9<br>(12.4-13.5) | 12.7<br>(12.2-13.2) | 12.5<br>(12.0-13.0) | 12.3<br>(11.8-12.8) | 11.6<br>(11.1-12.1) | 11.6<br>(11.1-12.1) | 11.1<br>(10.7-11.6) | 11.5<br>(11.1-12.0) | 11.0<br>(10.5-11.4) | 10.5<br>(10.0-10.9) | 10.6<br>(10.1-11.0) |
| Women                   | 14.5<br>(13.9-15.2) | 13.9<br>(13.3-14.6) | 14.9<br>(14.2-15.5) | 14.1<br>(13.5-14.8) | 14.7<br>(14.1-15.4) | 13.8<br>(13.2-14.5) | 14.0<br>(13.4-14.6) | 13.2<br>(12.6-13.8) | 13.1<br>(12.5-13.7) | 12.9<br>(12.3-13.5) | 12.4<br>(11.8-13.0) | 11.8<br>(11.2-12.4) | 11.5<br>(10.9-12.0) |
| LOS, median<br>(IQR), d |                     |                     |                     |                     |                     |                     |                     |                     |                     |                     |                     |                     |                     |
| Total                   | 7 (5)               | 7 (5)               | 7 (5)               | 7 (5)               | 7 (5)               | 7 (5)               | 7 (5)               | 7 (5)               | 7 (5)               | 7 (5)               | 7 (5)               | 7 (5)               | 7 (5)               |
| Preprocedure            | 1 (3)               | 1 (3)               | 1 (3)               | 1 (3)               | 1 (3)               | 1 (3)               | 1 (3)               | 0 (2)               | 0 (2)               | 0 (2)               | 0 (2)               | 0 (2)               | 0 (2)               |
| Postprocedure           | 6 (4)               | 6 (5)               | 6 (5)               | 6 (5)               | 6 (5)               | 6 (5)               | 6 (5)               | 6 (5)               | 6 (5)               | 6 (5)               | 6 (5)               | 6 (5)               | 6 (5)               |
| Race                    |                     |                     |                     |                     |                     |                     |                     |                     |                     |                     |                     |                     |                     |
| White                   | 13.3<br>(12.9-13.8) | 12.7<br>(12.3-13.2) | 13.6<br>(13.2-14.1) | 13.1<br>(12.7-13.5) | 13.4<br>(13.0-13.9) | 12.8<br>(12.4-13.2) | 12.4<br>(12.0-12.8) | 12.1<br>(11.7-12.4) | 11.7<br>(11.4-12.1) | 12.0<br>(11.6-12.4) | 11.4<br>(11.0-11.8) | 10.9<br>(10.5-11.2) | 10.8<br>(10.5-11.2) |
| Black                   | 17.7<br>(15.2-20.5) | 16.9<br>(14.5-19.6) | 17.2<br>(14.8-19.9) | 18.1<br>(15.7-20.7) | 14.7<br>(12.5-17.1) | 14.9<br>(12.8-17.3) | 17.9<br>(15.5-20.6) | 16.4<br>(14.2-18.9) | 16.3<br>(13.9-18.9) | 14.0<br>(11.8-16.3) | 14.7<br>(12.5-17.1) | 14.8<br>(12.7-17.1) | 14.1<br>(12.0-16.4) |
| Other                   | 15.6<br>(13.0-18.6) | 13.6<br>(11.3-16.3) | 13.2<br>(10.9-15.9) | 12.9<br>(10.7-15.3) | 11.7<br>(9.64-14.0) | 13.7<br>(11.6-16.1) | 12.8<br>(10.7-15.0) | 12.9<br>(10.8-15.3) | 13.5<br>(11.3-15.9) | 14.3<br>(12.0-16.9) | 12.9<br>(10.9-15.2) | 10.6<br>(8.75-12.7) | 11.1<br>(9.29-13.2) |
| AVR                     |                     |                     |                     |                     |                     |                     |                     |                     |                     |                     |                     |                     |                     |
| Without CABG            | 12.1<br>(11.5-12.7) | 11.8<br>(11.2-12.4) | 12.4<br>(11.9-13.1) | 12.0<br>(11.4-12.6) | 11.5<br>(11.0-12.1) | 11.7<br>(11.2-12.3) | 10.1<br>(9.61-10.7) | 10.5<br>(9.96-11.0) | 10.4<br>(9.90-10.9) | 10.3<br>(9.86-10.9) | 10.0<br>(9.57-10.5) | 9.9<br>(9.45-10.4)  | 9.9<br>(9.44-10.3)  |
| With CABG               | 14.7<br>(14.2-15.3) | 13.8<br>(13.3-14.4) | 14.8<br>(14.2-15.4) | 14.4<br>(13.8-14.9) | 15.0<br>(14.5-15.6) | 14.0<br>(13.4-14.5) | 14.6<br>(14.1-15.2) | 13.8<br>(13.3-14.4) | 13.4<br>(12.9-14.0) | 13.9<br>(13.3-14.5) | 13.2<br>(12.7-13.8) | 12.3<br>(11.8-12.9) | 12.3<br>(11.8-12.9) |
| 30-Readmission Rates    |                     |                     |                     |                     |                     |                     |                     |                     |                     |                     |                     |                     |                     |
| Overall                 | 21.5<br>(20.9-22.0) | 21.4<br>(20.9-22.0) | 20.9<br>(20.4-21.4) | 21.7<br>(21.2-22.2) | 21.1<br>(20.6-21.6) | 21.6<br>(21.2-22.1) | 20.9<br>(20.5-21.4) | 21.3<br>(20.8-21.8) | 21.2<br>(20.7-21.6) | 21.0<br>(20.5-21.5) | 20.7<br>(20.2-21.1) | 20.1<br>(19.6-20.6) | 19.6<br>(19.2-20.0) |
| AVR                     |                     |                     |                     |                     |                     |                     |                     |                     |                     |                     |                     |                     |                     |
| Without CABG            | 20.6<br>(19.8-21.4) | 20.9<br>(20.1-21.7) | 20.0<br>(19.3-20.8) | 20.8<br>(20.0-21.5) | 20.1<br>(19.3-20.8) | 20.9<br>(20.1-21.6) | 19.5<br>(18.8-20.2) | 20.2<br>(19.5-20.9) | 20.1<br>(19.4-20.8) | 19.9<br>(19.3-20.6) | 19.9<br>(19.3-20.6) | 19.2<br>(18.6-19.8) | 19.0<br>(18.5-19.6) |
| With CABG               | 22.2<br>(21.5-22.9) | 21.9<br>(21.2-22.6) | 21.7<br>(21.0-22.4) | 22.5<br>(21.8-23.2) | 22.0<br>(21.3-22.7) | 22.3<br>(21.7-23.0) | 22.2<br>(21.5-22.8) | 22.2<br>(21.6-22.9) | 22.2<br>(21.5-22.9) | 22.1<br>(21.4-22.9) | 21.5<br>(20.8-22.2) | 21.2<br>(20.5-21.9) | 19.9<br>(19.2-20.6) |

Abbreviation: AVR, aortic valve replacement; CABG, coronary artery bypass graft surgery; IQR, interquartile range

**eTable 6.** Age-sex-race-comorbidity-adjusted annual trends in 30-day mortality rates of aortic valve replacements, overall and by subgroups

© 2013 American Medical Association. All rights reserved.

| <b>Condition</b> | <b>Odds ratio</b> | <b>95% CI lower</b> | <b>95% CI upper</b> |
|------------------|-------------------|---------------------|---------------------|
| Overall          | 0.959             | 0.956               | 0.963               |
| Age              |                   |                     |                     |
| 65-74            | 0.963             | 0.956               | 0.969               |
| 75-84            | 0.958             | 0.953               | 0.963               |
| 85+              | 0.951             | 0.942               | 0.960               |
| Race             |                   |                     |                     |
| White            |                   |                     |                     |
| Male             | 0.954             | 0.949               | 0.959               |
| Female           | 0.951             | 0.946               | 0.957               |
| Black            |                   |                     |                     |
| Male             | 0.929             | 0.903               | 0.956               |
| Female           | 0.956             | 0.934               | 0.979               |
| Other Race       |                   |                     |                     |
| Male             | 0.947             | 0.923               | 0.971               |
| Female           | 0.980             | 0.953               | 1.009               |
| AVR with CABG    | 0.966             | 0.962               | 0.971               |
| Age              |                   |                     |                     |
| 65-74            | 0.971             | 0.962               | 0.980               |
| 75-84            | 0.965             | 0.958               | 0.972               |
| 85+              | 0.956             | 0.944               | 0.968               |
| Race             |                   |                     |                     |
| White            |                   |                     |                     |
| Male             | 0.961             | 0.954               | 0.967               |
| Female           | 0.958             | 0.951               | 0.966               |
| Black            |                   |                     |                     |
| Male             | 0.958             | 0.925               | 0.993               |
| Female           | 0.968             | 0.937               | 0.999               |
| Other Race       |                   |                     |                     |
| Male             | 0.946             | 0.916               | 0.976               |
| Female           | 1.000             | 0.963               | 1.038               |
| AVR without CABG | 0.953             | 0.947               | 0.958               |

© 2013 American Medical Association. All rights reserved.

|            |       |       |       |
|------------|-------|-------|-------|
| Age        |       |       |       |
| 65-74      | 0.953 | 0.943 | 0.962 |
| 75-84      | 0.951 | 0.944 | 0.959 |
| 85+        | 0.948 | 0.934 | 0.961 |
| Race       |       |       |       |
| White      |       |       |       |
| Male       | 0.944 | 0.936 | 0.952 |
| Female     | 0.949 | 0.941 | 0.957 |
| Black      |       |       |       |
| Male       | 0.903 | 0.873 | 0.934 |
| Female     | 0.947 | 0.917 | 0.977 |
| Other Race |       |       |       |
| Male       | 0.970 | 0.936 | 1.004 |
| Female     | 0.973 | 0.940 | 1.008 |

Abbreviation: AVR, Aortic Valve Replacement; CABG, Coronary Artery Bypass Graft

**eTable 7.** Age-sex-race-comorbidity-adjusted annual trends in 1-year mortality rates of aortic valve replacements, overall and by subgroups

| Condition     | Odds ratio | 95% CI lower | 95% CI upper |
|---------------|------------|--------------|--------------|
| Overall       | 0.975      | 0.972        | 0.977        |
| Age           |            |              |              |
| 65-74         | 0.972      | 0.967        | 0.977        |
| 75-84         | 0.974      | 0.970        | 0.978        |
| 85+           | 0.975      | 0.968        | 0.982        |
| Race          |            |              |              |
| White         |            |              |              |
| Male          | 0.973      | 0.969        | 0.976        |
| Female        | 0.966      | 0.961        | 0.970        |
| Black         |            |              |              |
| Male          | 0.961      | 0.942        | 0.980        |
| Female        | 0.958      | 0.941        | 0.976        |
| Other Race    |            |              |              |
| Male          | 0.957      | 0.938        | 0.977        |
| Female        | 0.986      | 0.964        | 1.009        |
| AVR with CABG | 0.979      | 0.975        | 0.983        |
| Age           |            |              |              |
| 65-74         | 0.979      | 0.972        | 0.986        |
| 75-84         | 0.977      | 0.972        | 0.982        |
| 85+           | 0.979      | 0.969        | 0.988        |
| Race          |            |              |              |
| White         |            |              |              |
| Male          | 0.976      | 0.971        | 0.981        |
| Female        | 0.969      | 0.963        | 0.975        |
| Black         |            |              |              |
| Male          | 0.974      | 0.946        | 1.003        |
| Female        | 0.970      | 0.944        | 0.997        |
| Other Race    |            |              |              |
| Male          | 0.950      | 0.924        | 0.977        |

© 2013 American Medical Association. All rights reserved.

|                  |       |       |       |
|------------------|-------|-------|-------|
| Female           | 1.008 | 0.975 | 1.042 |
| AVR without CABG | 0.972 | 0.968 | 0.977 |
| Age              |       |       |       |
| 65-74            | 0.967 | 0.959 | 0.974 |
| 75-84            | 0.973 | 0.967 | 0.978 |
| 85+              | 0.976 | 0.966 | 0.986 |
| Race             |       |       |       |
| White            |       |       |       |
| Male             | 0.969 | 0.963 | 0.975 |
| Female           | 0.968 | 0.962 | 0.974 |
| Black            |       |       |       |
| Male             | 0.944 | 0.920 | 0.970 |
| Female           | 0.947 | 0.923 | 0.972 |
| Other Race       |       |       |       |
| Male             | 0.971 | 0.942 | 1.000 |
| Female           | 0.976 | 0.947 | 1.006 |

Abbreviation: AVR, Aortic Valve Replacement; CABG, Coronary Artery Bypass Graft



**eTable 8.** Age-sex-race-comorbidity-adjusted annual trends in 30-day readmission rates of aortic valve replacements, overall and by subgroups

| Condition     | Hazard ratio | 95% CI lower | 95% CI upper |
|---------------|--------------|--------------|--------------|
| Overall       | 0.989        | 0.987        | 0.991        |
| Age           |              |              |              |
| 65-74         | 0.984        | 0.981        | 0.988        |
| 75-84         | 0.990        | 0.987        | 0.993        |
| 85+           | 0.993        | 0.988        | 0.999        |
| Race          |              |              |              |
| White         |              |              |              |
| Male          | 0.988        | 0.986        | 0.991        |
| Female        | 0.989        | 0.986        | 0.992        |
| Black         |              |              |              |
| Male          | 0.990        | 0.975        | 1.006        |
| Female        | 0.988        | 0.974        | 1.003        |
| Other Race    |              |              |              |
| Male          | 0.987        | 0.972        | 1.003        |
| Female        | 1.000        | 0.983        | 1.016        |
| AVR with CABG | 0.992        | 0.989        | 0.995        |
| Age           |              |              |              |
| 65-74         | 0.988        | 0.983        | 0.993        |
| 75-84         | 0.993        | 0.989        | 0.997        |
| 85+           | 0.998        | 0.990        | 1.006        |
| Race          |              |              |              |
| White         |              |              |              |
| Male          | 0.991        | 0.988        | 0.995        |
| Female        | 0.993        | 0.988        | 0.998        |
| Black         |              |              |              |
| Male          | 1.003        | 0.980        | 1.026        |
| Female        | 1.000        | 0.977        | 1.022        |
| Other Race    |              |              |              |
| Male          | 0.992        | 0.971        | 1.013        |
| Female        | 1.000        | 0.975        | 1.025        |

|                  |       |       |       |
|------------------|-------|-------|-------|
| AVR without CABG | 0.987 | 0.984 | 0.989 |
| Age              |       |       |       |
| 65-74            | 0.982 | 0.977 | 0.987 |
| 75-84            | 0.989 | 0.985 | 0.993 |
| 85+              | 0.991 | 0.982 | 0.999 |
| Race             |       |       |       |
| White            |       |       |       |
| Male             | 0.986 | 0.981 | 0.990 |
| Female           | 0.987 | 0.983 | 0.992 |
| Black            |       |       |       |
| Male             | 0.978 | 0.957 | 0.999 |
| Female           | 0.980 | 0.961 | 0.999 |
| Other Race       |       |       |       |
| Male             | 0.982 | 0.959 | 1.005 |
| Female           | 1.002 | 0.980 | 1.025 |

Abbreviation: AVR, Aortic Valve Replacement; CABG, Coronary Artery Bypass Graft

eTable 9.. Trends in the type of AVR and utilization of concomitant CABG, 1999-2011.

|                                                   | 1999 | 2000 | 2001 | 2002 | 2003 | 2004 | 2005 | 2006 | 2007 | 2008 | 2009 | 2010 | 2011 |
|---------------------------------------------------|------|------|------|------|------|------|------|------|------|------|------|------|------|
| <b>Replacement with bioprosthesis (%)</b>         | 44.1 | 48.2 | 51.6 | 55.5 | 58.6 | 61.4 | 64.4 | 67.9 | 69.7 | 70.6 | 71.2 | 72.3 | 72.7 |
| <b>Replacement with mechanical prosthesis (%)</b> | 55.9 | 51.8 | 48.4 | 44.6 | 41.4 | 38.6 | 35.7 | 32.1 | 30.3 | 29.4 | 28.8 | 27.7 | 27.3 |
| <b>Utilization of bioprosthesis</b>               |      |      |      |      |      |      |      |      |      |      |      |      |      |
| <i>By age, %</i>                                  |      |      |      |      |      |      |      |      |      |      |      |      |      |
| 65-74, y                                          | 37.1 | 42.2 | 45.5 | 49.2 | 53.2 | 56.4 | 59.8 | 63.8 | 65.7 | 67.1 | 68.0 | 68.9 | 69.5 |
| 75-84, y                                          | 48.2 | 51.3 | 54.7 | 59.0 | 61.2 | 64.0 | 66.9 | 70.1 | 71.7 | 72.5 | 72.4 | 74.0 | 74.2 |
| ≥85, y                                            | 53.8 | 56.5 | 59.6 | 61.5 | 66.3 | 67.0 | 68.9 | 71.9 | 73.9 | 74.1 | 75.8 | 75.5 | 76.1 |
| <i>By gender, %</i>                               |      |      |      |      |      |      |      |      |      |      |      |      |      |
| Men                                               | 44.3 | 48.4 | 52.3 | 55.8 | 58.7 | 61.8 | 64.8 | 68.2 | 69.9 | 71.1 | 71.3 | 73.2 | 73.0 |
| Women                                             | 43.9 | 47.9 | 50.6 | 55.0 | 58.5 | 60.8 | 63.7 | 67.5 | 69.4 | 70.0 | 71.0 | 71.0 | 72.2 |
| <i>By race, %</i>                                 |      |      |      |      |      |      |      |      |      |      |      |      |      |
| White                                             | 44.5 | 48.7 | 52.1 | 56.2 | 59.1 | 62.0 | 64.8 | 68.3 | 70.1 | 71.0 | 71.6 | 72.6 | 73.1 |
| Black                                             | 40.0 | 42.5 | 43.5 | 46.0 | 51.6 | 52.2 | 58.1 | 61.3 | 60.3 | 62.5 | 62.0 | 66.0 | 64.7 |
| Other                                             | 35.6 | 38.5 | 44.9 | 44.8 | 51.1 | 54.6 | 58.8 | 63.8 | 66.6 | 67.6 | 68.2 | 69.1 | 69.7 |
| <b>Utilization of mechanical prosthesis</b>       |      |      |      |      |      |      |      |      |      |      |      |      |      |
| <i>By age, %</i>                                  |      |      |      |      |      |      |      |      |      |      |      |      |      |
| 65-74, y                                          | 63.0 | 57.9 | 54.5 | 50.8 | 46.8 | 43.7 | 40.3 | 36.2 | 34.4 | 33.0 | 32.0 | 31.1 | 30.5 |
| 75-84, y                                          | 51.8 | 48.8 | 45.3 | 41.0 | 38.8 | 36.0 | 33.1 | 29.9 | 28.3 | 27.5 | 27.6 | 26.0 | 25.8 |
| ≥85, y                                            | 46.2 | 43.5 | 40.4 | 38.5 | 33.7 | 33.0 | 31.1 | 28.1 | 26.1 | 25.9 | 24.2 | 24.5 | 23.9 |
| <i>By gender, %</i>                               |      |      |      |      |      |      |      |      |      |      |      |      |      |
| Men                                               | 55.7 | 51.7 | 47.7 | 44.2 | 41.3 | 38.2 | 35.2 | 31.8 | 30.1 | 28.9 | 28.7 | 26.8 | 27.0 |
| Women                                             | 56.1 | 52.1 | 49.5 | 45.0 | 41.5 | 39.2 | 36.3 | 32.5 | 30.6 | 30.0 | 29.0 | 29.0 | 27.8 |
| <i>By race, %</i>                                 |      |      |      |      |      |      |      |      |      |      |      |      |      |
| White                                             | 55.5 | 51.3 | 47.9 | 43.9 | 40.9 | 38.0 | 35.2 | 31.7 | 29.9 | 29.0 | 28.4 | 27.4 | 26.9 |
| Black                                             | 60.0 | 57.5 | 56.6 | 54.1 | 48.4 | 47.8 | 41.9 | 38.7 | 39.8 | 37.5 | 38.2 | 34.0 | 35.3 |
| Other                                             | 64.5 | 61.5 | 55.1 | 55.2 | 48.9 | 45.4 | 41.2 | 36.2 | 33.4 | 32.4 | 31.8 | 30.9 | 30.4 |

Abbreviation: AVR, Aortic Valve Replacement; CABG, Coronary Artery Bypass Graft

**eFigure.** Annual Change Rates in Procedure, Mortality, and Readmission  
Aortic Valve Surgery Rates

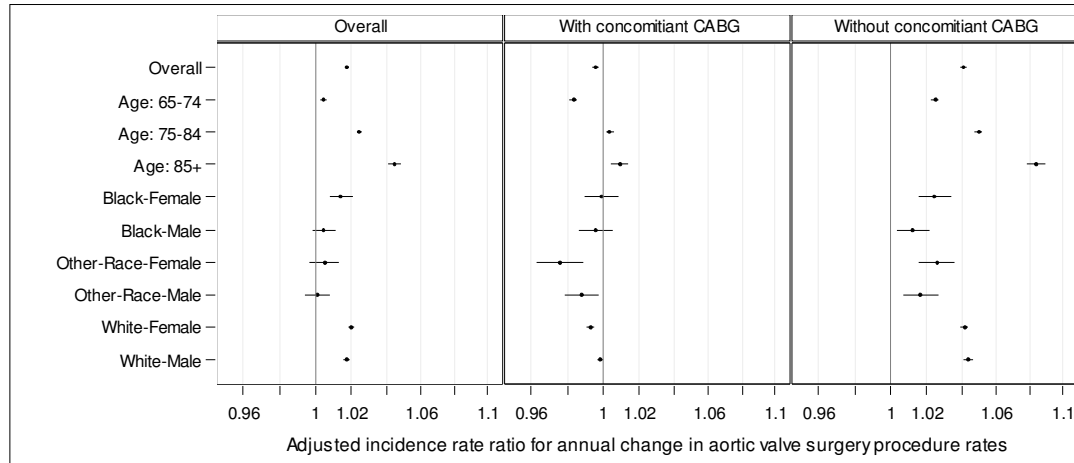

**30-Day Mortality**

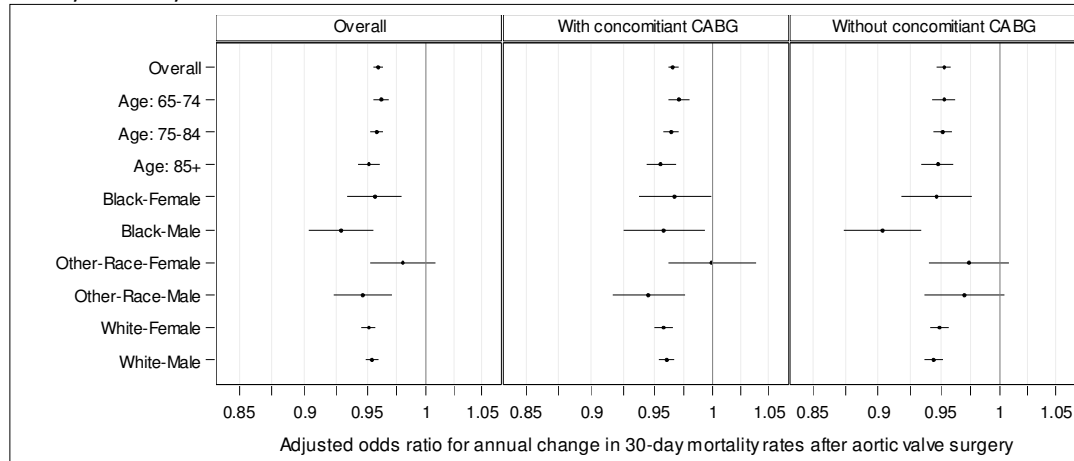

**eFigure.** Annual Change Rates in Procedure, Mortality, and Readmission (continued)

One-Year Mortality Rates

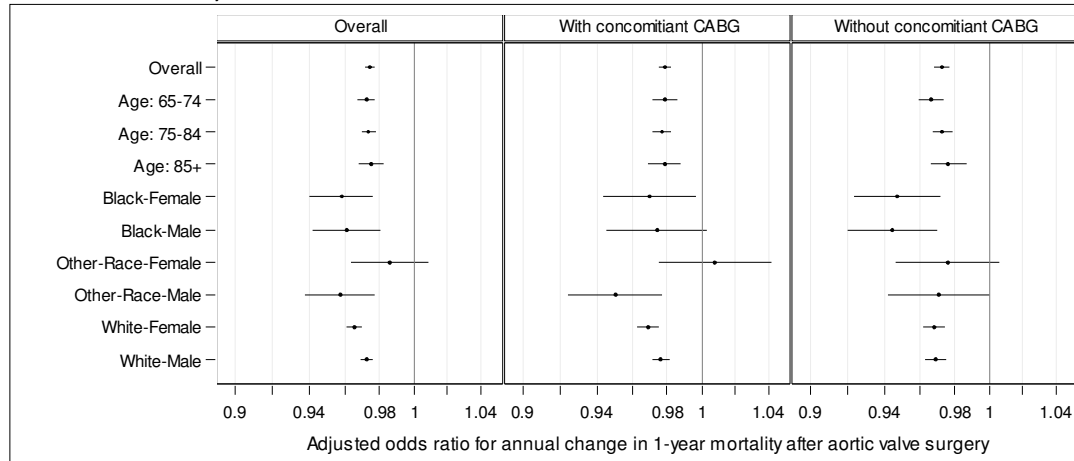

Thirty-Day Readmission Rates After Aortic Valve Surgery

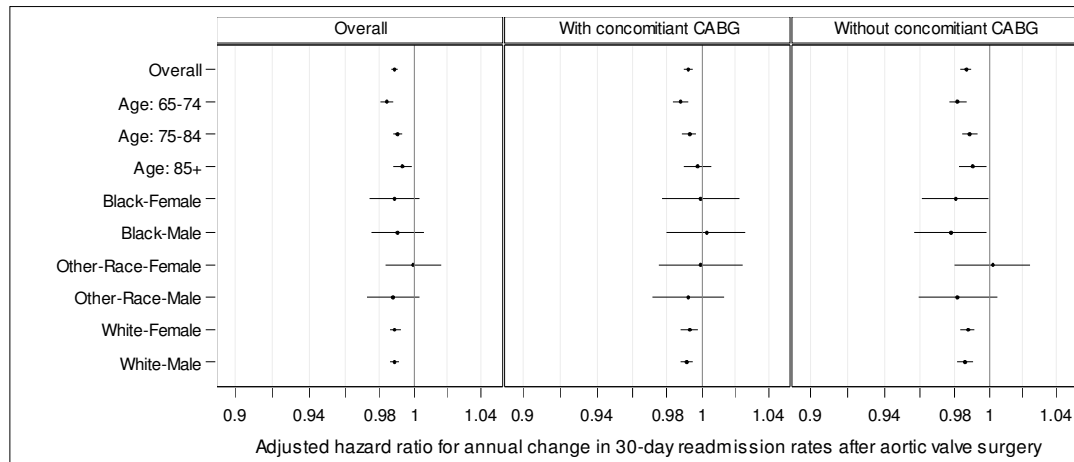

Supplement: NIHMS587000-supplement-Supplemental_Data.pdf [file NIHMS587000-supplement-Supplemental_Data.pdf]
